# Supplementary material
Source: Springer Nature journal article supplement (https://www.springermedizin.de/resource/supplementary/12955_2007_443_MOESM1_ESM.pdf/9560460)

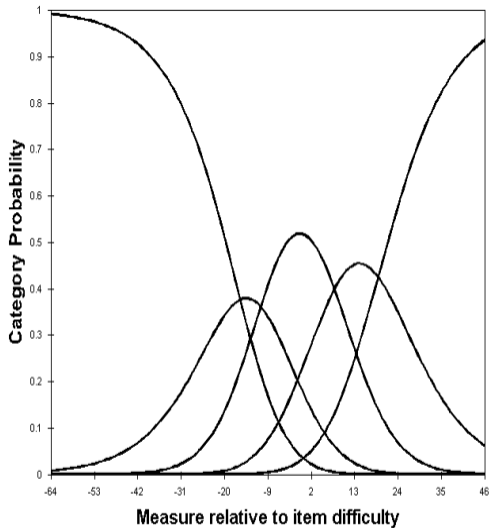

**Child self-report**

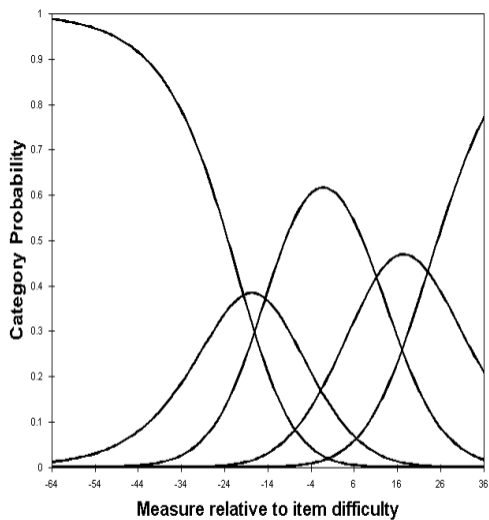

**Parent proxy-report**

Supplement: MOESM1 [file 9560460]
